# Supplementary material
Source: MDPI journal article supplement (https://www.mdpi.com/2311-7524/8/3/188)
Supplement: s1 [file s1]

|           |                                                                                                          |     |
|-----------|----------------------------------------------------------------------------------------------------------|-----|
| AtNRT1.1  | MSLFEETKSTDTLLLAWLFCGGRFAIRSKTCGWASAAAMILCIEAVERITITIGIGVNLVTYLTCTMHLGNATAANTVTNFICTSEFMCILGCFIACFTIGRYL | 100 |
| BcNRT1.1  | MSLFEETKTQTLLLAWLFCGGRFAIRSKTCGWASAAAMILCIEAVERITITIGIGVNLVTYLTCTMHLGNATAANTVTNFICTSEFMCILGCFIACFTIGRYL  | 99  |
| BrNRT1.1  | MSLFEETKTQTLLLAWLFCGGRFAIRSKTCGWASAAAMILCIEAVERITITIGIGVNLVTYLTCTMHLGNATAANTVTNFICTSEFMCILGCFIACFTIGRYL  | 99  |
| Consensus | mslpetk lldawdfqgrpadrsktggwasaamilcieaverlittigigvnlvtyltgtrhlgndataantvtnflgtsfmlcllggfiactflgryl      |     |
| AtNRT1.1  | TIAIFAAICATGVSIITLSTIIPGLRFPFRNFTTSSHCQASGIGLTIVLYALYLTAIGTCGGVKASVSGFGSCFDTEPKERSKMTYFFNRFFFCINVG       | 200 |
| BcNRT1.1  | TIAIFAAICATGVSIITLSTIIPGLRFPFRNFTTSSHCQASGIGLTIVLYALYLTAIGTCGGVKASVSGFGSCFDTEPKERSKMTYFFNRFFFCINVG       | 199 |
| BrNRT1.1  | TIAIFAAICATGVSIITLSTIIPGLRFPFRNFTTSSHCQASGIGLTIVLYALYLTAIGTCGGVKASVSGFGSCFDTEPKERSKMTYFFNRFFFCINVG       | 199 |
| Consensus | tiaifaaicatgvsiltlstiipglrprc pttsshc qasgigltvlyalyltalgtggvkasvsgfgsdqfd tepkers rtyffnrfffcinvg       |     |
| AtNRT1.1  | SLIMAVTVLVYQCDIVGRKWGYGICAAIVLSISVFLAGTNRYRFKKIIGSFMTQVAVVAAWNRRIELHAFESLYDMLDIIAAEGSMKQKQKLPHTE         | 300 |
| BcNRT1.1  | SLIMAVTVLVYQCDIVGRKWGYGICAAIVLSISVFLAGTNRYRFKKIIGSFMTQVAVVAAWNRRIELHAFESLYDMLDIIAAEGSMKQKQKLPHTE         | 299 |
| BrNRT1.1  | SLIMAVTVLVYQCDIVGRKWGYGICAAIVLSISVFLAGTNRYRFKKIIGSFMTQVAVVAAWNRRIELHAFESLYDMLDIIAAEGSMKQKQKLPHTE         | 299 |
| Consensus | sl avtvlv y qcdvgrkwgygica aivl ls flagtnryrfkkligsfpmqtva v vaawnr r lelp dqs lyd dd iaegsmk kqklpht    |     |
| AtNRT1.1  | QFRSLDKAARFQCEACVTNENKWTILSTIIDVEVKQIVRMFIWATCILEFWTVHAQITLISVACSETLIRIGSFEIPFASAVAVFYVGLLIITAVYD        | 400 |
| BcNRT1.1  | QFRSLDKAARFQCEACVTNENKWTILSTIIDVEVKQIVRMFIWATCILEFWTVHAQITLISVACSETLIRIGSFEIPFASAVAVFYVGLLIITAVYD        | 399 |
| BrNRT1.1  | QFRSLDKAARFQCEACVTNENKWTILSTIIDVEVKQIVRMFIWATCILEFWTVHAQITLISVACSETLIRIGSFEIPFASAVAVFYVGLLIITAVYD        | 399 |
| Consensus | qfrsldkaa r dge t nv nkwtilst td eevkqivrmfiwatcilfwtvhaqitlislvaqset dr igsfeippa ravfy glllittavdyd    |     |
| AtNRT1.1  | RVAILCKKLFNYEHGIRFLCRIGLGLFEGSMANAVAAVLEIKRLTAHAHGETVKTIELGFSILIPCYLIVGIGEALITYGCLDFFIRECPKMGKMTST       | 500 |
| BcNRT1.1  | RVAILCKKLFNYEHGIRFLCRIGLGLFEGSMANAVAAVLEIKRLTAHAHGETVKTIELGFSILIPCYLIVGIGEALITYGCLDFFIRECPKMGKMTST       | 499 |
| BrNRT1.1  | RVAILCKKLFNYEHGIRFLCRIGLGLFEGSMANAVAAVLEIKRLTAHAHGETVKTIELGFSILIPCYLIVGIGEALITYGCLDFFIRECPKMGKMTST       | 499 |
| Consensus | r ai lckklfnypghlrplqrlgl m ravaalve krlltahahgetvktlplgf llipqylivgigealiytgcldffirecpkmgk rst          |     |
| AtNRT1.1  | GILLSTIALGFFHFSSVLIVTEKTRKAHPWIADINKRLYNFYWLVAVVAINFLFLVFSKWYVYKEKRIADGIELDEEFIPMG                       | 589 |
| BcNRT1.1  | GILLSTIALGFFHFSSVLIVTEKTRKAHPWIADINKRLYNFYWLVAVVAINFLFLVFSKWYVYKEKRIADGIELDEEFIPMG                       | 588 |
| BrNRT1.1  | GILLSTIALGFFHFSSVLIVTEKTRKAHPWIADINKRLYNFYWLVAVVAINFLFLVFSKWYVYKEKRIADGIELDEEFIPMG                       | 588 |
| Consensus | gillstlaigffhfssvlvtevk t kahpwiaaddlnkgrlynfylwlvav valnfl flvfskwyvykekrla giel de iprg                |     |
| AtNRT1.2  | .....MEVFEFVSFWEGYALWRNRAAVKCRHCGMLA                                                                     | 31  |
| BcNRT1.2  | .....MLA                                                                                                 | 3   |
| BrNRT1.2  | MKSFSNNKGFNSFFISPNWTISQCILSSIYNINILITTYIYFIIKITSIFTSFQCSIRERKKERIMEVFEFVSFWEGYALWRNRAAVKCRHCGMLA         | 100 |
| Consensus | mla rla                                                                                                  |     |
| AtNRT1.2  | ASFVLVVEILENLAYLANASNVLVLYREYMHSPSKSANDVNFMCATALLALIGCFISDAFFSTYVIFLISASIEFGLIIITICARTPSLMFPCDGP         | 131 |
| BcNRT1.2  | ASFVLVVEILENLAYLANASNVLVLYREYMHSPSKSANDVNFMCATALLALIGCFISDAFFSTYVIFLISASIEFGLIIITICARTPSLMFPCDGP         | 103 |
| BrNRT1.2  | ASFVLVVEILENLAYLANASNVLVLYREYMHSPSKSANDVNFMCATALLALIGCFISDAFFSTYVIFLISASIEFGLIIITICARTPSLMFPCDGP         | 200 |
| Consensus | asf lvveilenlaylanasnvlvlylreymh spsksandvnmfctafllaligglfisdaffst iflisasiefgliliiitqartpslmpp cd p     |     |
| AtNRT1.2  | TCESVSGSKAAMLFVGLYIYVAIGVGGIKGSIASHGAEQFDESTFKRKRSTYFNYFVFCIACCAIVAVTFVWVLEDNKGWEGFCVSTIAIFVSILIFL       | 231 |
| BcNRT1.2  | TCESVSGSKAAMLFVGLYIYVAIGVGGIKGSIASHGAEQFDESTFKRKRSTYFNYFVFCIACCAIVAVTFVWVLEDNKGWEGFCVSTIAIFVSILIFL       | 203 |
| BrNRT1.2  | TCESVSGSKAAMLFVGLYIYVAIGVGGIKGSIASHGAEQFDESTFKRKRSTYFNYFVFCIACCAIVAVTFVWVLEDNKGWEGFCVSTIAIFVSILIFL       | 300 |
| Consensus | tce vsgskaamlfvgllyiyvaigvggikgs l shgaeqfdestfkrkrst fnyfvfclacgalvavtfvvwlednkgwegfcvstiaifvsilifl     |     |
| AtNRT1.2  | SCSRYRNKIFCGSPITITILKVLAAASVKSCSGSSNAVAMSVSSESNHCVSKGKKEVESQCELEKFCFEAIPF.FAQITNSIRVINGADEKHEVRL         | 330 |
| BcNRT1.2  | SCSRYRNKIFCGSPITITILKVLAAASVKSCSGSSNAVAMSVSSESNHCVSKGKKEVESQCELEKFCFEAIPF.FAQITNSIRVINGADEKHEVRL         | 298 |
| BrNRT1.2  | SCSRYRNKIFCGSPITITILKVLAAASVKSCSGSSNAVAMSVSSESNHCVSKGKKEVESQCELEKFCFEAIPF.FAQITNSIRVINGADEKHEVRL         | 395 |
| Consensus | sgs frynkifcgsplititilkvllaasvks csgssnavamsv ssnhcvskgk keves qcelekrq e pp qltnsl ln aa ekp h l        |     |
| AtNRT1.2  | LECTQCCVEDVKIVLKMFLIFACTIMINCCLAQLSTFSVQCAASMNKIGSLKIPFASLHVFFVVFIMILAPIYDHLIIPFARKTKTETGVTHLQRIGV       | 430 |
| BcNRT1.2  | LECTQCCVEDVKIVLKMFLIFACTIMINCCLAQLSTFSVQCAASMNKIGSLKIPFASLHVFFVVFIMILAPIYDHLIIPFARKTKTETGVTHLQRIGV       | 398 |
| BrNRT1.2  | LECTQCCVEDVKIVLKMFLIFACTIMINCCLAQLSTFSVQCAASMNKIGSLKIPFASLHVFFVVFIMILAPIYDHLIIPFARKTKTETGVTHLQRIGV       | 495 |
| Consensus | lect qccvedvkivlkrplifactimnccqlaqlstfsvqqaasmntkigslkipaslp fpvffimilapiydhliipfark tktetgvthlqrigv     |     |
| AtNRT1.2  | GLVISILANAAVAALVEIKRKCVAKDSLIDSKETLEP.TFLWIAIQYIFLGSADLFTLAGLIEYFFTEAPSMRSLATSI.SWASIAMGYLSSVIVSIVNS     | 530 |
| BcNRT1.2  | GLVISILANAAVAALVEIKRKCVAKDSLIDSKETLEP.TFLWIAIQYIFLGSADLFTLAGLIEYFFTEAPSMRSLATSI.SWASIAMGYLSSVIVSIVNS     | 498 |
| BrNRT1.2  | GLVISILANAAVAALVEIKRKCVAKDSLIDSKETLEP.TFLWIAIQYIFLGSADLFTLAGLIEYFFTEAPSMRSLATSI.SWASIAMGYLSSVIVSIVNS     | 595 |
| Consensus | glvlsilaravaalveikrkqvakd glldsketlp tflwialqylflgsadlftlaglleyffteap smrslatslswasiamgyllssvivsivns     |     |
| AtNRT1.2  | ITGSSGNFWIRGKSNRYKLYFYWLMCVLSAANFIHYLFWAMRYKYRSTGSR                                                      | 584 |
| BcNRT1.2  | ITGSSGNFWIRGKSNRYKLYFYWLMCVLSAANFIHYLFWAMRYKYRSTGSR                                                      | 546 |
| BrNRT1.2  | ITGSSGNFWIRGKSNRYKLYFYWLMCVLSAANFIHYLFWAMRYKYRSTGSR                                                      | 649 |
| Consensus | itgssgn pwlrg inrykldyfywlmcvlsaanflhylfwamr                                                             |     |
| AtNRT2.1  | MCDSTIGPEGSSMHCVTGREGFAFVSQSPIVETKTAKEDLVIDEHKATVFKLFSFAKPHMRTFHLWSISFSTCFVSTFAAFLVPIIRENLNLTQCDI        | 100 |
| BcNRT2.1  | .....MHCVTGREGFAFVSQSPIVETKTAKEDLVIDEHKATVFKLFSFAKPHMRTFHLWSISFSTCFVSTFAAFLVPIIRENLNLTQCDI               | 89  |
| BrNRT2.1  | MCDSTIGPEGSSMHCVTGREGFAFVSQSPIVETKTAKEDLVIDEHKATVFKLFSFAKPHMRTFHLWSISFSTCFVSTFAAFLVPIIRENLNLTQCDI        | 100 |
| Consensus | mhgvtgreq fafsv spiv toktakfdlpvd ehkatvfkf lfs fakphmrtfhlswisfstcfvstfaaflvp iirenlnltkqdi             |     |
| AtNRT2.1  | GNACVASVSGSIFSRIVMCAVCDLLCFRYGCAFLVMSAPTVFMSFVSQAGGITVRFMIGFCLATFVSCQYWMSTMFNSQITGLVNCTAACGWNMGCG        | 200 |
| BcNRT2.1  | GNACVASVSGSIFSRIVMCAVCDLLCFRYGCAFLVMSAPTVFMSFVSQAGGITVRFMIGFCLATFVSCQYWMSTMFNSQITGLVNCTAACGWNMGCG        | 189 |
| BrNRT2.1  | GNACVASVSGSIFSRIVMCAVCDLLCFRYGCAFLVMSAPTVFMSFVSQAGGITVRFMIGFCLATFVSCQYWMSTMFNSQITGLVNCTAACGWNMGCG        | 200 |
| Consensus | gnagvasvsgsifsrivmcavcdllcprygcaflvmsaptvfmsfvs a ggitvrfmigfclatfvscqymstmrnfnsqiiglvngtaagwnmgcg       |     |
| AtNRT2.1  | VTQLIMEIYVEIIRRCGSTAFTAWRAFFVEGWLHIIMCVLVNLGCDLPIGNRSALERRKEVAKCKEGLIMWYAVTNYRTWIFVLLYCYSMCVELSTDN       | 300 |
| BcNRT2.1  | VTQLIMEIYVEIIRRCGSTAFTAWRAFFVEGWLHIIMCVLVNLGCDLPIGNRSALERRKEVAKCKEGLIMWYAVTNYRTWIFVLLYCYSMCVELSTDN       | 289 |
| BrNRT2.1  | VTQLIMEIYVEIIRRCGSTAFTAWRAFFVEGWLHIIMCVLVNLGCDLPIGNRSALERRKEVAKCKEGLIMWYAVTNYRTWIFVLLYCYSMCVELSTDN       | 300 |
| Consensus | tqlmpiyveiirrcg taftawr affvgwlhiimg lvlnlgcdlpdgnr lek gevakckgki wyavtnyrtwifvlllygysmgvelstdn         |     |
| AtNRT2.1  | VIAEYFDFRHLKLHTAGLIAACFGMANFFARPAGGYASDAAKYFGMRGRILWLWIQTAGGLFCVWIGRANTILVTAVVAMVLFSCQAACGATFAIV         | 400 |
| BcNRT2.1  | VIAEYFDFRHLKLHTAGLIAACFGMANFFARPAGGYASDAAKYFGMRGRILWLWIQTAGGLFCVWIGRANTILVTAVVAMVLFSCQAACGATFAIV         | 389 |
| BrNRT2.1  | VIAEYFDFRHLKLHTAGLIAACFGMANFFARPAGGYASDAAKYFGMRGRILWLWIQTAGGLFCVWIGRANTILVTAVVAMVLFSCQAACGATFAIV         | 400 |
| Consensus | viae yffdrfhklhtag iaacfgmanffarpaggyasd aakyfgmgrgrlw lwiiqtagglfcvwlgrantilvtavvamvlfscqaacgatfaiv     |     |
| AtNRT2.1  | PFVSRRALGIIISGLTCAGGNFGSGLTCLIFFSTSEFTTEQGLTWMCMVIVACTIPVTIHFPCWGSMEIPFESTILPVKCTEHHYASEWNECEKQKNHQQ     | 500 |
| BcNRT2.1  | PFVSRRALGIIISGLTCAGGNFGSGLTCLIFFSTSEFTTEQGLTWMCMVIVACTIPVTIHFPCWGSMEIPFESTILPVKCTEHHYASEWNECEKQKNHQQ     | 489 |
| BrNRT2.1  | PFVSRRALGIIISGLTCAGGNFGSGLTCLIFFSTSEFTTEQGLTWMCMVIVACTIPVTIHFPCWGSMEIPFESTILPVKCTEHHYASEWNECEKQKNHQQ     | 500 |
| Consensus | pfvssralqiiisgltcaggnfgsgltcll ffstseftteqgltwmcmvivactipvti hfpcwgsmlfpsttpvkcte hy y sewnecekqn hqq    |     |
| AtNRT2.1  | SIRFAENAKSEGGERSAATPEPTENN                                                                               | 529 |
| BcNRT2.1  | SIRFAENAKSEGGERSAATPEPTENN                                                                               | 510 |
| BrNRT2.1  | SIRFAENAKSEGGERSAATPEPTENN                                                                               | 528 |
| Consensus | sirfaenaksegg r isa                                                                                      |     |

**Figure S2.** Multiple sequence alignment of NRT protein sequences from *Brassica Campestris* (Bc), *Arabidopsis thaliana* (At), and *Brassica rapa* (Br).
