# Supplementary material
Source: MDPI journal article supplement (https://www.mdpi.com/2311-7524/8/3/188)
Supplement: s1 [file s1]

Archive with 4 entries (4 files):
- Supplementary Figure S1.PCR amplification of NRT genes from Brassica campestris.pdf
- Supplementary Figure S2.Multiple sequence alignment of NRT protein sequences from Brassica Campestris (Bc), Arabidopsis thaliana (At), and Brassica rapa (Br).pdf
- Supplementary Table S1. Sequences of primers used for this study.xls
- Supplementary Table S2.Sequence information of NRT proteins from different species.xlsx
