# Supplementary material
Source: MDPI journal article supplement (https://www.mdpi.com/2311-7524/8/3/188)
Supplement: s1 [file s1 › Supplementary Figure S1.PCR amplification of NRT genes from Brassica campestris.pdf]

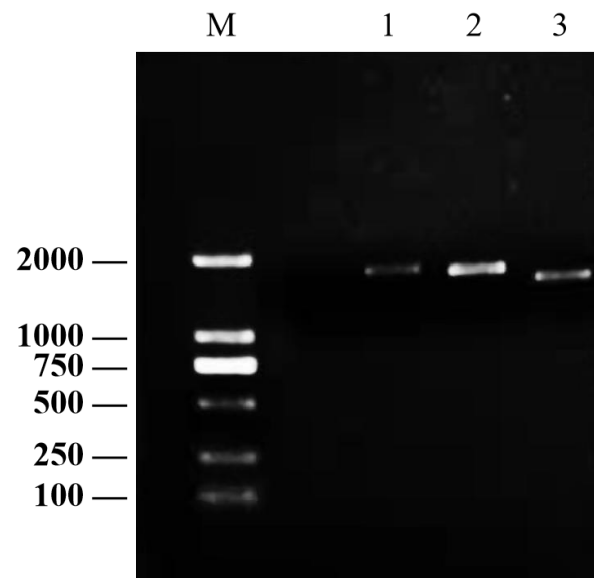

**Figure S1.** PCR amplification of *NRT* genes from *Brassica campestris* cDNA. M: DNA marker DL 2000, 1: *BcNRT1.1*, 2:*BcNRT1.2*, 3:*BcNRT2.1*.
