# Supplementary material
Source: MDPI journal article supplement (https://www.mdpi.com/2311-7524/8/3/188)
Supplement: s1 [file s1 › Supplementary Table S1. Sequences of primers used for this study.xls]

## Sheet: Sheet1
Supplementary Table S1. Sequences of primers used for this study
	Reference sequence	Gene	Primer name	sequences
full-length cDNA primers	AtNRT1.1 Gene ID: 837763	BcNRT1.1	BcNRT1.1F	ACCAAAGAAACCAAAAGC
			BcNRT1.1R	CCATTATTTGTGGAATCAGA
	AtNRT1.2 Gene ID: 843321	BcNRT1.2	BcNRT1.2F	TTTTACTTCTTCTCCTCAAA
			BcNRT1.2R	CTCCAACACCTCCACTAT
	AtNRT2.1 Gene ID: 837327	BcNRT2.1	BcNRT2.1F	AAATCTCAAACTTGTAAAGGAAC
			BcNRT2.1R	TCTTATCTGCGACCATCCT
qPCR primers	BcNRT1.1	q-BcNRT1.1	q-BcNRT1.1F	CCAACGACCTCGTCTCAT
			q-BcNRT1.1R	CCTTCACTCCTCCAGTTCCT
	BcNRT1.2	q-BcNRT1.2	q-BcNRT1.2F	CTATCGCCATCTTCGTCTC
			q-BcNRT1.2R	GGACTCCCATTAGAACAACTC
	BcNRT2.1	q-BcNRT2.1	q-BcNRT2.1F	TCCAGTTAAAGGTACGGAGGAG
			q-BcNRT2.1R	TAGCAGAGCGGCTACGAG
		q-β-actin	q-β-actinF	GACTACGAGCANGAGNTNGAGAC
			q-β-actinR	CTGTTGGAANGTGCTGAGGGA
		q-GAPDH	q-GAPDHF	CAGGTTTGGAATTGTCGAGG
			q-GAPDHR	GAGCTGTGGAAGCACCTTTC
