# Supplementary material
Source: MDPI journal article supplement (https://www.mdpi.com/2311-7524/8/3/188)
Supplement: s1 [file s1 › Supplementary Table S2.Sequence information of NRT proteins from different species.xlsx]

## Sheet: Sheet1
Protien name	NCBI RefSeq ID	Amino acid sequence
AtNRT1.1	NP_563899.1	MSLPETKSDDILLDAWDFQGRPADRSKTGGWASAAMILCIEAVERLTTLGIGVNLVTYLTGTMHLGNATA ANTVTNFLGTSFMLCLLGGFIADTFLGRYLTIAIFAAIQATGVSILTLSTIIPGLRPPRCNPTTSSHCEQ ASGIQLTVLYLALYLTALGTGGVKASVSGFGSDQFDETEPKERSKMTYFFNRFFFCINVGSLLAVTVLVY VQDDVGRKWGYGICAFAIVLALSVFLAGTNRYRFKKLIGSPMTQVAAVIVAAWRNRKLELPADPSYLYDV DDIIAAEGSMKGKQKLPHTEQFRSLDKAAIRDQEAGVTSNVFNKWTLSTLTDVEEVKQIVRMLPIWATCI LFWTVHAQLTTLSVAQSETLDRSIGSFEIPPASMAVFYVGGLLL…
AtNRT1.2	NP_564978.1	MEVEEEVSRWEGYADWRNRAAVKGRHGGMLAASFVLVVEILENLAYLANASNLVLYLREYMHMSPSKSAN DVTNFMGTAFLLALLGGFLSDAFFSTFQIFLISASIEFLGLIILTIQARTPSLMPPSCDSPTCEEVSGSK AAMLFVGLYLVALGVGGIKGSLASHGAEQFDESTPKGRKQRSTFFNYFVFCLACGALVAVTFVVWLEDNK GWEWGFGVSTIAIFVSILIFLSGSRFYRNKIPCGSPLTTILKVLLAASVKCCSSGSSSNAVASMSVSPSN HCVSKGKKEVESQGELEKPRQEEALPPRAQLTNSLKVLNGAADEKPVHRLLECTVQQVEDVKIVLKMLPI FACTIMLNCCLAQLSTFSVQQAASMNTKIGSLKIPPASLPIFPV…
AtNRT1.5	NP_174523.2	MSCLEIYNKDTMKKKEGEEETRDGTVDYYGRPSIRSNSGQWVAGIVILLNQGLATLAFFGVGVNLVLFLT RVLQQNNADAANNVSKWTGTVYIFSLVGAFLSDSYWGRYKTCAIFQVIFVIGLSSLSLSSYMFLIRPRGC GDEVTPCGSHSMMEITMFYFSIYLIALGYGGYQPNIATLGADQFDEEHPKEGYSKIAFFSYFYLALNLGS LFSNTILGYFEDEGMWALGFWASTGSAIIGLILFLVGTPRYFKPTGNLSRFCQVLVAATKKSSVEAP LRGREEMYDGDSEGKNASVNTGRRIVHTDEFKFLDKAAYITARDLDDKKQDSVNPWRLCPVTQVEEVKCI LRLMPIWLCTIIYSVVFTQMASLFVEQGAAMNTSVSDFKIPPASMSS…
AtNRT1.6	NP_001321840.1	MLYLRNVFHMEPVEAFNVYYLWMGLTNFAPLLGALISDAYIGRFKTIAYASLFSILGLMTVTLTACLPQL HPPPCNNPHPDECDDPNKLQLGILFLGLGFLSIGSGGIRPCSIPFGVDQFDQRTEQGLKGVASFFNWYYL TLTMVLIFSHTVVVYLQTVSWVIGFSIPTSLMACAVVLFFVGMRFYVYVKPEGSVFSGIARVIVAARKKR DLKISLVDDGTEEYYEPPVKPGVLSKLPLTDQFKFLDKAAVILDGDLTSEGVPANKWRLCSIQEVEEVKC LIRVVPVWSAGIISIVAMTTQATFMVFQATKMDRHMGPHFEIPAASITVISYITIGIWVPIYEHLLVPFL WRMRKFRVTLLQRMGIGIVFAILSMFTAGFVEGVRRTRATEMTQ…
AtNRT1.7	NP_564979.1	MVLEDRKDGSSLPGRSGSFSKSSPSELDVVDPYKRISSPGSILDAEKVEKKPGGWRAVSFILGNETLERL GSIGLLANFMVYLTKVFHLEQVDAANVINIWSGFTNLTPLVGAYISDTYVGRFKTIAFASFATLLGLITI TLTASFPQLHPASCNSQDPLSCGGPNKLQIGVLLLGLCFLSVGSGGIRPCSIPFGVDQFDQRTEEGVKGV ASFFNWYYMTFTVVLIITQTVVVYIQDQVSWIIGFSIPTGLMALAVVMFFAGMKRYVYVKPEGSIFSGIA QVIVAARKKRKLKLPAEDDGTVTYYDPAIKSSVLSKLHRSNQFRCLDKAAVVIEGDLTPEGPPADKWRLC SVQEVEEVKCLIRIVPIWSAGIISLAAMTTQGTFTVSQALKMDR…
AtNRT1.8	NP_193899.2	MDQKVRQFEVCTQDGSVDRHGNPAIRANTGKWLTAILILVNQGLATLAFFGVGVNLVLFLTRVMGQDNAE AANNVSKWTGTVYIFSLLGAFLSDSYWGRYKTCAIFQASFVAGLMMLSLSTGALLLEPSGCGVEDSPCKP HSTFKTVLFYLSVYLIALGYGGYQPNIATFGADQFDAEDSVEGHSKIAFFSYFYLALNLGSLFSNTVLGY FEDQGEWPLGFWASAGSAFAGLVLFLIGTPKYRHFTPRESPWSRFCQVLVAATRKAKIDVHHEELNLYDS ETQYTGDKKILHTKGFRFLDRAAIVTPDDEAEKVESGSKYDPWRLCSVTQVEEVKCVLRLLPIWLCTILY SVVFTQMASLFVVQGAAMKTNIKNFRIPASSMSSFDILSVAFFI…
AtNRT2.1	NP_172288.1	MGDSTGEPGSSMHGVTGREQSFAFSVQSPIVHTDKTAKFDLPVDTEHKATVFKLFSFAKPHMRTFHLSWI SFSTCFVSTFAAAPLVPIIRENLNLTKQDIGNAGVASVSGSIFSRLVMGAVCDLLGPRYGCAFLVMLSAP TVFSMSFVSDAAGFITVRFMIGFCLATFVSCQYWMSTMFNSQIIGLVNGTAAGWGNMGGGITQLLMPIVY EIIRRCGSTAFTAWRIAFFVPGWLHIIMGILVLNLGQDLPDGNRATLEKAGEVAKDKFGKILWYAVTNYR TWIFVLLYGYSMGVELSTDNVIAEYFFDRFHLKLHTAGLIAACFGMANFFARPAGGYASDFAAKYFGMRG RLWTLWIIQTAGGLFCVWLGRANTLVTAVVAMVLFSMGAQAACG…
AtNRT2.2	NP_172289.1	MGSTDEPGSSMHGVTGREQSYAFSVDGSEPTNTKKKYNLPVDAEDKATVFKLFSFAKPHMRTFHLSWISF STCFVSTFAAAPLIPIIRENLNLTKHDIGNAGVASVSGSIFSRLVMGAVCDLLGPRYGCAFLVMLSAPTV FSMSFVSDAAGFITVRFMIGFCLATFVSCQYWMSTMFNSQIIGLVNGTAAGWGNMGGITQLLMPIVYEI IRRCGSTAFTAWRIAFFVPGWLHIIMGILVLTLGQDLPGGNRAAMEKAGEVAKDKFGKILWYAVTNYRTW IFVLLYGYSMGVELSTDNVIAEYFFDRFHLKLHTAGIIAACFGMANFFARPAGGWASDIAAKRFGMRGRL WTLWIIQTSGGLFCVWLGRANTLVTAVVSMVLFSLGAQAACGATF…
AtNRT2.3	NP_200886.1	MTHNHSNEEGSIGTSLHGVTAREQVFSFSVDASSQTVQSDDPTAKFALPVDSEHRAKVFNPLSFAKPHMR AFHLGWLSFFTCFISTFAAAPLVPIIRDNLDLTKTDIGNAGVASVSGAIFSRLAMGAVCDLLGARYGTAF SLMLTAPTVFSMSFVGGPSGYLGVRFMIGFCLATFVSCQYWTSVMFNGKIIGLVNGCAGGWGDMGGGVTQ LLMPMVFHVIKLAGATPFMAWRIAFFVPGFLQVVMGILVLSLGQDLPDGNLSTLQKSGQVSKDKFSKVFW FAVKNYRTWILFVLYGSSMGIELTINNVISGYFYDRFNLKLQTAGIVAASFGMANFIARPFGGYASDVAA RVFGMRGRLWTLWIFQTVGALFCIWLGRASSLPIAILAMMLFSI…
AtNRT2.4	NP_200885.1	MADGFGEPGSSMHGVTGREQSYAFSVESPAVPSDSSAKFSLPVDTEHKAKVFKLLSFEAPHMRTFHLAWI SFFTCFISTFAAAPLVPIIRDNLNLTRQDVGNAGVASVSGSIFSRLVMGAVCDLLGPRYGCAFLVMLSAP TVFSMSFVGGAGGYITVRFMIGFCLATFVSCQYWMSTMFNGQIIGLVNGTAAGWGNMGGGVTQLLMPMVY EIIRRLGSTSFTAWRMAFFVPGWMHIIMGILVLTLGQDLPDGNRSTLEKKGAVTKDKFSKVLWYAITNYR TWVFVLLYGYSMGVELTTDNVIAEYFFDRFHLKLHTAGIIAASFGMANFFARPIGGWASDIAARRFGMRG RLWTLWIIQTLGGFFCLWLGRATTLPTAVVFMILFSLGAQAACG…
AtNRT2.6	NP_190092.1	MAHNHSNEDGSIGTSLHGVTAREQVFSFSVQEDVPSSQAVRTNDPTAKFALPVDSEHRAKVFKPLSFAKP HMRAFHLGWISFFTCFISTFAAAPLVPVIRDNLDLTKTDIGNAGVASVSGAIFSRLAMGAVCDLLGARYG TAFSLMLTAPAVFSMSFVADAGSYLAVRFMIGFCLATFVSCQYWTSVMFTGKIIGLVNGCAGGWGDMGGG VTQLLMPMVFHVIKLTGATPFTAWRFAFFIPGILQIVMGILVLTLGQDLPDGNLSTLQKSGQVSKDKFSK VFWFAVKNYRTWILFMLYGFSMGVELTINNVISGYFYDRFNLTLHTAGIIAASFGMANFFARPFGGYASD VAARLFGMRGRLWILWILQTVGALFCIWLGRASSLPIAILAMML…
AtNRT2.7	NP_196961.1	MEPSQRNTKPPSFSDSTIPVDSDGRATVFRPFSLSSPHSRAFHLAWLSLFSCFFSTFSIPPLVPVISSDL NLSASTVSAAGIASFAGSIFSRLAMGPLCDLIGPRTSSAILSFLTAPVILSASLVSSPTSFILVRFFVGF SLANFVANQYWMSSMFSGNVIGLANGVSAGWANVGAGISQLLMPLIYSTIAEFLPRAVAWRVSFVFPAIF QVTTAVLVLLYGQDTPHGNRKNSNQNKLTIPEEEEVLVVEEDERSSFVEILIGGLGNYRAWILALLYGYS YGVELTTDNVIAGYFYERFGVNLEAAGTIAASFGISNIASRPAGGMISDALGKRFGMRGRLWGLWIVQSV AGLLCVLLGRVNSLWGSILVMWVFSVFVQAASGLVFGVVPFVST…
BcNRT1.1	-	MSLPETKTQTLLDAWDFQGRPADRSKTGGWASAAMILCIEAVERLTTLGIGVNLVTYLTGTMHLGNATAANTVTNFLGTSFMLCLLGGFIADTFLGRYLTIAIFAAIQATGVSILTLSTIIPGLRPPRCDPTTSSHCVQASGIQLTVLYLALYLTALGTGGVKASVSGFGSDQFDDTEPKERSQMTYFFNRFFFCINVGSLMAVTVLVYIQDDVGRKWGYGICALAIVLSLSIFLAGTNRYRFKKLIGSPMTQVATVLVAAWRNRRLELPSDPSFLYDLDDVIAAEGSMKSKQKLPHTNQFRSLDKAAIKDQEMAMTQNVYNKWTLSTVTDIEEVKQIVRMLPIWATCILFWTVHAQLTTLSVAQSETMDRHIGSFEIPPAAMAVFYIGGLLLTTAVYD…
BcNRT1.2	-	MLAASFTLVVEILENLAYLANASNLVLYLREYMHLSPSKSANDVTNFMGTAFLLALLGGFLSDAFFSTYVIFLISASIEFLGLIILTIQARTPSLMPPTCDGPTCESVSGSKAAMLFVGLYLVALGVGGIKGSLPSHGAEQFDESTPKGRKQRSTYFNYFVFCLACGALVAVTFVVWLEDNKGWEWGFGVSTIAIFVSILIFLSGSKFYRNKIPCGSPLTTILKVLLAASVKSCSNGSPSNAVVNLAISPSNHLKEVTESGELEKPRQQEPVPPPQTQLTNSLRFLNRAAEEKPDHKLLECTIQQVEDVKIVLKMLPIFACTIMLNCCLAQLSTFSVQQAASMNTKIGSLKIPPASLPVFPVVFIMILAPIYDHLIIPFARKTTKTETGVTHLQRIGVG…
BcNRT2.1	-	MHGVTGREQTFAFSVASPIVPTDKTAKFDLPVDSEHKATVFKLFSFAKPHMRTFHLSWISFSTCFVSTFAAAPLVPIIRENLNLTKQDIGNAGVASVSGSIFSRLVMGAVCDLLGPRYGCAFLVMLSAPTVFSMSFVSGAGGFITVRFMIGFCLATFVSCQYWMSTMFNSQIIGLVNGTAAGWGNMGGGVTQLLMPIVYEIIRRCGATAFTAWRLAFFVPGWLHIIMGVLVLNLGQDLPDGNRSALEKKGEVAKDKFGKIMWYAVTNYRTWIFVLLYGYSMGVELSTDNVIAEYFFDRFHLKLHTAGIIAACFGMANFFARPAGGYASDLAAKYFGMRGRLWALWIIQTAGGLFCVWLGRANTLVTAVVAMVLFSLGAQAACGATFAIVPFVSRRALGI…
BrNRT1.1	XP_009146163.2	MSLPETKSQTLLDAWDFQGRPADRSKTGGWASAAMILCIEAVERLTTLGIGVNLVTYLTGTMHLGNATAA NTVTNFLGTSFMLCLLGGFIADTFLGRYLTIAIFAAIQATGVSILTLSTIIPGLRPPRCNPTTSSHCVQA SGIQLTVLYLALYLTALGTGGVKASVSGFGSDQFDETEPKEQSQMTYFFNRFFFCINVGSLCAVTVLVYI QDDVGRKWGYGICALSIVLALSVFLAGTNRYRFKKLIGSPMTQVATVIVAAWRNRRLELPSDPSFLYDLD DVIAAEGAMKSKQKLPHTKQFRSLDKAAIKNQETAMTQNVFNKWTLSTLTDVEEVKQIVRMLPIWATCIL FWTVHAQLTTLSVAQSETMDRHIGSFEIPPASMAVFYVGGLLLT…
BrNRT1.2	XP_009105655.2	MKSFSNNKEGPNSPFLSPNWTLSQCLLSSIYLNFINTLLTFTYIYFLIIKTSIFTSSPQSLRERKKERIM EVEEEVSRWEGYADWRNKAAVKGRHGGMLAASFTLVVEILENLAYLANASNLVLYLREYMHLSPSKSAND VTNFMGTAFLLALLGGFLSDAFFSTYVIFLISASIEFLGLIILTIQARTPSLMPPTCDGPTCESVSGSKA AMLFVGLYLVALGVGGIKGSLPSHGAEQFDESTPKGRKQRSTYFNYFVFCLACGALVAVTFVVWLEDNKG WEWGFGVSTIAIFVSILIFLSGSKFYRNKIPCGSPLTTILKVLLAASVKSCSNGSPSNAVVNLAISPSNH LKEVTESGELEKPRQQEPVPPPQTQLTNSLRFLNRAAEEKPDHK…
BrNRT2.1	XP_009148068.3	MGDSTGEPGSSMHGVTGREQTFAFSVASPIVPTDKTAKFDLPVDSEHKATVFKLFSFAKPHMRTFHLSWI SFSTCFVSTFAAAPLVPIIRENLNLTKQDIGNAGVASVSGSIFSRLVMGAVCDLLGPRYGCAFLVMLSAP TVFSMSFVHDAGGFITVRFMIGFCLATFVSCQYWMSTMFNSQIIGLVNGTAAGWGNMGGGITQLLMPIVY EIIRRCGATAFTAWRIAFFVPGWLHIIMGVLVLNLGQDLPDGNRSALEKKGEVAKDKFGKIMWYAVTNYR TWIFVLLYGYSMGVELSTDNVIAEYFFDRFHLKLHTAGIIAASFGMANFFARPAGGYASDLAAKYFGMRG RLWALWIIQTAGGLFCVWLGRANTLVTAVVAMILFSLGAQAACG…
BrNRT2.3	XP_009120613.1	MASNEEGSIGTSLHGVTAKEHVFSFSADASSQVVPSNDPTSKFALPVDSEHRAKVFNPLSFAKPHMRAFH LGWISFFTCFISTFAAAPLVPIIRDNLDLTKTDIGNAGVASVSGAIFSRLAMGAVCDLLGARYGTAFSLM LTAPMVFTMSFVTGPVGYLAVRFMIGFCLATFVSCQYWTSVMFNGKIIGLVNGCAGGWGDMGGGVTQLLM PMVFHVIKLAGATPFMAWRIAFFVPGFLQVVMGILVLTFGQDLPDGNLSTLQKSGQVSKDKFSKVFWFAV KNYRTWILFVLYGFSMGIELTINNVISGYFFDRFNLKLQTAGIVAASFGMANFFARPFGGYASDVAAKLF GMRGRLWILWIFQTVGALFCIWLGRANSLPIAVLAMILFSIGTQ…
BrNRT2.4	XP_009120612.1	MANGLGEPGSSMHGVTGREQSYAFSVQSPVVPSDTSAMFSLPVDTEHKAKVFKLLSFAAPHMRTFHLAWI SFFTCFISTFAAAPLVPIIRDNLNLTRQDVGNAGVASVSGSIFSRLVMGAVCDLLGPRYGCAFLVMLSAP TVFSMSFVADAGGYITVRFMIGFCLATFVSCQYWMSTMFNGQIIGLVNGTAAGWGNMGGGVTQLLMPLVY EIIRRLGSTSFTAWRMAFFVPGWMHIIMGILVLTLGQDLPDGNRSTLEKKGAVTKDKFSKVLWYAITNYR TWVFVLLYGYSMGVELTTDNVIAEYFFDRFHLKLHTAGIIAASFGMANFFARPIGGWASDISARYFGMRG RLWTLWIIQTLGGCFCVLLGRATTLPTAVFSMILFSLGAQAACG…
BrNRT2.5	XP_009110611.1	MDVEGKGEESRTTTTTRRFALPVDSENKSTTFRLFSVAKPHMRAFHLSWFQFFCCFVSTFAAPPLLPVIR ENLNLTATDIGNAGIASVSGSVFARLVMGTACDLFGPRLASAALTLSTAPAVYFTAGIKSPIGFIMVRFF AGFSLATFVSTQFWMSSMFSGPVVGSANGIAAGWGNLGGGATQLIMPLVFSVIRQMGATKFTAWRIAFFI PGLFQTFSAFAVLLFGQDLPDGDYWAMHKSGEKEKDEVGKVITHGITNYRGWITALAYGYCFGVELTIDN IIAEYFFDRFHLNLNTAGIIAASFGLANFFARPGGGILSDLMARRFGMRGRLWSWWIIQTLGGVLCASLG QIDSLTGSIVVMLIFSVFVQASCGLTFGVVPFISRRSLGVISGM…
BrNRT2.6	XP_033128496.1	MAPNEDGSIGSSLHGVRAREQVFSLSVEDGPSSQAIRSDDPTAKFAIPVDSEHRAKVFKPLSFAKPHMRA FHLGWISFFTCFISTFAAAPLVPVIRDNLDLNKTDIGNAGVASVSGAIFSRLAMGAVCDLLGARYGTAFS LLLSAPAVFFMSFVSDAGSYLAVRFMIGFCLATFVSCQYWTSVMFNGKIIGLVNGCAGGWGDMGGGVTQL LMPMVYHVIKLTGATPFTAWRFAFFIPGFLQIIMGILVLTLGQDLPDGNLSTLQKSGQVSKDKFSKVFWF AVKNYRTWILFVLYGFSMGVELTINNVISEYFYDRFHLTLHTAGIIAASFGMANFFARPFGGYASDVAAR LFGMRGRLWTLWILQTVGALFCIWLGRASSLPIAILAMMLFSIG…
BrNRT2.7	XP_009125986.2	MEPSQRNTETPSFHYATVPVDSSGRATVFRPFSLSSPHSRAFHLAWLSLFSCFFSTFSIPPLIPVISSDI RLSASAVSAAGTASFAGSIFSRLAMGPLCDLIGPRTSSAILSFLTAPAILSTAFVSSPTSFVLVRFFVGF SLANFVANQYWMSSMFSGNVVGLANGVSAGWANVGAGLSQLLMPILYTTIAEFLPRDVSWRVSFVFPAVF QVVTAVLVLIYGQDTPDGKRKAYKDRTQLEEDERSSFVRILLDGLGDYRAWILALLYGYSFGVELTTDNM IAGYFYERFGMNLEAAGTIAASFAISNVASRPAGGMVSDLLGKRFGMRGRLWGLWIVQSVAGLLCLLLGR VNSLWGSIAVMWVFSIFVQAASGLIFGVVPFVSTRSLGVVAGMT…
BrNRT3.1	XP_009118895.1	MAIHKILFASLLICLLIQSSHAATKERLFSDLEKSALEVTATPSRVGEGVVLAAGVDKLSITWKVSSTAT KEPEFKAIKVKLCYAPASQVDRPWRKTENELFKDKSCPHKISSWSYDPAMKAGQSFDYTLERDIPTGTYF VRAYAVDTKDHEVAFGQSTNEDKTTNLFSVQAISGRHKSLDIASVCFSVFSVVALLVFFVNEKRKAKIEQ SE
CmNRT2.1	NP_001236444.1	MPDIEGSPGSSMHGVTGREPVLAFSVQSPVVHTDRTAKFDLPVDSEHKATVFKLFSFANPHMRTFHLSWI SFFTTFISTFAAAPLVPIIRDNLDLTKADIGNAGVASVSGSIFSRLVMGAVCDLLGPRYGCAFLIMLAAP TVFCMSFVSDASGYIIVRFMIGFSLATFVSCQYWMSTMFNSKIIGLVNGTAAGWGNMGGGATQLLMPVMF EIIQKAGASPFVAWRIAFFIPGWFNVIMGILVLTLGQDLPDGNLGALQKNGDVAKDKFSKVLWYAVTNYR TWIFVLLYGYSMGVELTIDNVIAEYFYDRFDLKLHLAGIIAACFGMANLLARPFGGFTSDYMAKRFGMRG RLWNLWLLQTAGGVCCVFLGRVNSLTLAITFMMLFSIGAQAACG…
CsNRT1.1	NP_001275529.1	MNSSTHSQTKAILPDAWDYKGRPADRSKTGRWTAAAMILGGEAVERLTTLGIAVNLVTYMTGTMHLGNAV SANIVTNFLGTSFMLCLLGGFIADTFLGRYLTIAIFAAIQATGVTILTISTIIPSLRPPRCTVESSSHCA PATDFQLTILYIALYTTALGTGGLKSSVSGFGSDQFDESDKEERAQMTAFFNWFFFFISIGSLAAVTVLV YIQDNLGRQWGYGICACAIVAGLVVFVSGTKKYRFKKLVGSPLTQIATVIVAAWRKRHMDLPTDSSFLLD IDDFEDERKNGKMKKQKLPRSKQFRFLDKAAIREPEKGADIALMNKWNISTLTDVEEVKMVIRMLPIWAT NIMFWTVYAQMTTFSVSQATTMDRHIGKSFEIPAASLTVFFVGS…
CsNRT2.1	XP_010458033.1	MGDPTGEPGSSMHGVTGREQSFAFSVASPIVHTDKTAKFDLPVDTEHKATVFKLFSFSKPHMRTFHLSWI SFSTCFVSTFAAAPLVPIIRENLNLTKQDIGNAGVASVSGSIFSRLVMGAVCDLLGPRYGCAFLVMLSAP TVFSMSFVSGAAGFITVRFMIGFCLATFVSCQYWMSTMFNSQIIGLVNGTAAGWGNMGGGITQLLMPIVY EIIRRAGASAFTAWRIAFFVPGWLHIIMGILVLTLGQDLPDGNRAALEKSGEVAKDKFGKIMWYAVTNYR TWIFVLLYGYSMGVELSTDNVIAEYFFDRFHLKLHTAGLIAACFGMANFFARPAGGWASDFSAKYFGMRG RLWTLWIIQTAGGLFCVWLGRANTLVTAVVAMVLFSLGAQAACG…
GmNRT1.1	Accession: BAB19756.1 GI: 11933397	MTGVEAMEKNEKSVTDEEPKINYRGWKVMPFIIGNETFEKLGTIGTLANLLVYLTTVFNLSSLAATNIVN IFNGSASLSTLLGAFLCDTYFGRYKTLGFSTMASFLGLLVIQLTAWIKKMHPPHCGRDSITCIGPTTGQM GFLLAGFGLLIVGAAGIRPCNLAFGVDQFNPNTESGKKGINSFFNWYFFTFTFAQMVSLSLIVYIQSNVS WAIGLGIPAALMLISCTLYYTGSNYYVKVKATGPAPLTSLAQAVVVAIKKRRLNLSEYPLDSSLFAYVSP QSINSKLLHTSQFRFLDKAAIITPQDGINPDGSASDPWSLCSMQQVEELKCLLRVIPIWFAGIFFYIAIV QQNTMLVFQALQSDRRILSTNFKILAASYTIFQMLSLTIWLPIY…
GmNRT1.2	NP_001237970.2	MTGVETMGKNENQSVEKNEKSVIDEEPKINYRGWKVMPFIIGNETFEKLGTIGTLANLLVYLTTVFNLSS LTATNIINIFTGSASLSTLLGAFLCDTYFGRYKTLGFCTIASFLGLLVIQLTAWIKKMHPPHCGSESITC TGPTTGQMTFLLAGFGLLIVGAAGIRPCNLAFGVDQFNPNTESGKKGINSFFNWYFFTYTFAQMVSLSLI VYIQSNVSWAIGLGIPAALMLISCTLYYTGSNYYVKVKATGPAPLTSLAQAVVVAIKKRRLNLSEYPLDS SLFAYVSPQSINSKLLHTSQFRFLDKAAIITPQDGINPDGSASDPWSLCSMQQVEELKCLLRVIPIWFAG IFFYIAIVQQNTMLVFQALQSDRRILSTNFKILAASYTIFQMLS…
NtNRT1.2	NP_001312849.1	MALPETQQDSKALPDAWDYKGRPALRSSSGGWASGAMILGVEAVERLTTLGIAVNLVTYLTGTMHLGNAT AANNVTNFLGTSFMLTLFGGFVADTFLGRYLTIGIFATVQAMGVTILTISTIIPSLRPPKCEQVGSSSCI PANSKQLMVLYIALYMTALGTGGLKSSVSGFGTDQFDDADKKEKGQMIKFFDWFFFFINVGSLGAVTVLV YIQDNLGREWGYGICACAIVIGLVVFLSGTRKYRFKKLVGSPLTQIASVIVAAWKKRHLELLSDSSLLFE IDDIFGEGNKKNKQKLPHSKEYRFLDKAAIKEDHDLESNGTNVVINKWKLATLTDVEEVKLLIRMLPTWA TTIMFWTVYAQMTTFSVSQATTMDRHIGTFEIPPASLTVFFVGS…
OsNRT1.2	XP_015633790.1	MDAGEIIVAQPSPRLYKSLTFRRIATKERTIPQDEEMKIRSPRFQDESLTAPFILDKKARSKAPTVVLGF ECLESTAFNGIATNLVVYLETLLHGSNLASASNVTTWFGTSYLTPVFGAIIADTFWGNYNTILVSLVFYL LGMMLVTFSAFLPTTALCTVVGSSCQQPLLGAQTIAFLGLYLVAFGSGGVRAALLPFGADQFDDDNTADR ERKMSFFSWFYICVDFGMIVSGLFIVWIQQNVSWGLGFGIATACIALAFGGFVLATPMYKRRMPTGTPIK SLAQVVVAACRKARLRVPADTTLLYEVHDKINQSKIAHTDQFGFLDKAAVVMESDLEEESNDVAADASWR ICTVTQVEELKILLRLLPIWATSIVLSAAYAQLNTTFVQQGAAM…
OsNRT2.1	XP_015623638.1	MDSSTVGAPGSSLHGVTGREPAFAFSTEVGGEDAAAASKFDLPVDSEHKAKTIRLLSFANPHMRTFHLSW ISFFSCFVSTFAAAPLVPIIRDNLNLTKADIGNAGVASVSGSIFSRLAMGAICDMLGPRYGCAFLIMLAA PTVFCMSLIDSAAGYIAVRFLIGFSLATFVSCQYWMSTMFNSKIIGLVNGLAAGWGNMGGGATQLIMPLV YDVIRKCGATPFTAWRLAYFVPGTLHVVMGVLVLTLGQDLPDGNLRSLQKKGDVNRDSFSRVLWYAVTNY RTWIFVLLYGYSMGVELTTDNVIAEYFYDRFDLDLRVAGIIAASFGMANIVARPTGGLLSDLGARYFGMR ARLWNIWILQTAGGAFCLLLGRASTLPTSVVCMVLFSFCAQAAC…
OsNRT2.2	gi|1002238752|ref|XP_015623596.1|	MDSSTVGAPGSSLHGVTGREPAFAFSTEVGGEDAAAASKFDLPVDSEHKAKTIRLLSFANPHMRTFHLSW ISFFSCFVSTFAAAPLVPIIRDNLNLTKADIGNAGVASVSGSIFSRLAMGAICDMLGPRYGCAFLIMLAA PTVFCMSLIDSAAGYIAVRFLIGFSLATFVSCQYWMSTMFNSKIIGLVNGLAAGWGNMGGGATQLIMPLV YDVIRKCGATPFTAWRLAYFVPGTLHVVMGVLVLTLGQDLPDGNLRSLQKKGDVNRDSFSRVLWYAVTNY RTWIFVLLYGYSMGVELTTDNVIAEYFYDRFDLDLRVAGIIAASFGMANIVARPTGGLLSDLGARYFGMR ARLWNIWILQTAGGAFCLLLGRASTLPTSVVCMVLFSFCAQAAC…
OsNRT2.3	gi|1002226757|ref|XP_015628524.1|	MEAKPVAMEVEGVEAAGGKPRFRMPVDSDLKATEFWLFSFARPHMASFHMAWFSFFCCFVSTFAAPPLLP LIRDTLGLTATDIGNAGIASVSGAVFARLAMGTACDLVGPRLASASLILLTTPAVYCSSIIQSPSGYLLV RFFTGISLASFVSAQFWMSSMFSAPKVGLANGVAGGWGNLGGGAVQLLMPLVYEAIHKIGSTPFTAWRIA FFIPGLMQTFSAIAVLAFGQDMPGGNYGKLHKTGDMHKDSFGNVLRHALTNYRGWILALTYGYSFGVELT IDNVVHQYFYDRFDVNLQTAGLIAASFGMANIISRPGGGLLSDWLSSRYGMRGRLWGLWTVQTIGGVLCV VLGIVDFSFAASVAVMVLFSFFVQAACGLTFGIVPFVSRRSLGL…
OsNRT2.4	gi|1002228236|ref|XP_015636108.1|	MVAMEKKTKLVEEEDGCYYYDYGGYGDGVVDDEGRATELRPMALSRPHTQAFHLAWMSLFACFFAAFAAP PILPAMRPALVLAPSDASAAAVASLSATLVGRLAMGPACDLLGPRRASGVASLVCALALALAAVFASSPA GFVALRFVAGLSLANFVANQHWMSRIFAPSAVGLANAVAAGWANVGSAAAQVVMPVAYDAVVLRLGVPVT VAWRVTYLLPCAMLVTTGLAVLAFPYDLPGGGGGRCPGGGGGRRRSFWAVVRGGVGDYRAWLLGLTYGHC YGVELIMENVAADFFRRRFRLPMEAAGAAAACFGAMNAVARPAGGVASDEVARRFGMRGRLWALWAVQSA GAALCVLVGRMGAAEAPSLAATVAVMVACAAFVQAASGLTFGIV…
SlNRT2.1	XP_019069520.2	MTKLLKNYLRSDILTLVLINVASIMEMADETLLPGVYEEVGMDLRIDPAGLGSLSFYRSLVQCLCYPLAA FLASRHNHANGIALGAFLWSGATFLVAISSTFAEIAILRASNGTGLAIVTPAILSLVADSTDDTNRGTAF GWLALTGGLGSILGTLMSVLIAETSFMGIPGWRISFHLVGIISVLVGLLVYFFAEDPPFLDRDVNAKDLP PAEPFQEQLRELLKEAKSVIKVPSFKIIVAQGVFGSFLGTSLSFTTMWLELVGFSHKTTALISSLFVVSL SCGAVFGGFVGDVLAKHLPNSGRIIVSQISTGSAIPLAAILLLLSPIDPSTALLHGLVLFILGFCASWSG PATNRYVYSMLLFC
SlNRT2.3	gi|350539245|ref|NP_001234127.1|	MGDIEGSPGSSMHGVTGREPVLAFSVASLIVPTDTSANFKVPVDSEHKAKVFKFYSFSKPHGLTFQLSWI SFCTCFVSTFAAAPLVPIIRDNLNLTKMDVGNAGVASVSGSILSRLAMGAICDMLGPRYGCAFLIMLSAP TVLCMSFVSSAGGYVAVRFMIGFSLATFVSCQYWMSTMFNSQIIGLVNGTAAGWGNMGGGATQLIMPLLY DIIRRAGATPFTAWRIAFFIPGWLHVIMGILVLTLGQDLPDGNLASLQKKGDVSKDKFSKILWYAATNYR TWILVLLYGYSMGVELTTDNVIAEYFFDRFDLKLHTAGIIAATFGMANLLARPFGGWSSDVAAKHFGMRG RLWNSWILQTLGGVFCLLLGRATTLPLAITWMIIFSIGAQAACG…
SlNRT2.4	gi|460412027|ref|XP_004251405.1|	MATFESPLGREQTFAFSITSQNVCNNSQSNKFDLPVDSEHKAKSIKIFSFAQPHMRSFHLAWISFFTCFI STFAAAPLVPIIRDNLNLTRADIGNAGVASVSGSIFSRLIMGVLCDLIGPRYGCAFLNLLTAPIVFSVAF ISNAEGYIAMRFLVGFSLATFVSCQYWTSVMFNSQIIGLVNGVAGGWGDMGGGVTQLLMPFLFHIIKLTG ATPYTAWRIAFFIPGWLHIIIGLMVLILGQDLPDGNLSTLQKKGDVTKDQFSKVLRNAVTNYRTWVFFLL YGFSMGVELCINNVIAEYFYDKFNLKLHTAGMIAATFGMANFVARPFGGYASDLAARKFGMRGRLWVLWI VQTTGGAFCIWLGRAESLPIAIVSMILFSIGAQAACGATYGIIP…
SlNRT2.7	gi|723676777|ref|XP_004233327.2|	MIKFKWWCLEALFSHQSTHVNLHYKYSTCSSFPNSIHSIAIAMEEEQSHSKIDQSPNNFSIAVDYDHKAT EFRPFSLSSPHMRAFHLAWLSLFSCFFSTFAIPPLLEVIRKDLNLTQTDIGTAGIASFVGSIFSRLAMGP ACDVFGPRVASATLSLLTAPVVLSTSLISSAKSFILVRFLIGFSLANFVASQFWMSSMFSGCTVGLANGF AAGWANVGSGVTQLVMPLVYTLFTTCFNIPSFISWRIAFIFPAIFQAATAILVLVYGQDLPDGNYKRKIT NNQSENVLFNGLKNYRGWILGLTYGFCFGVELTTDNIIAAYFYNRFHVNIEMAGAIAASFGLANCVSRPV GGIVSDKMGKRFGMRGRLWSLWAVQTVAGLMCVLLGRVNTILAS…
SlNRT3.2	gi|723688012|ref|XP_010319027.1|	MAISTRAIFVATIVICSFLAVCEGDILFSTLKKSIEVKADHKAGVLMAGVDALTLKWSLNTTLPAGSDSG YKSVKLELCYAPISQKDRAWRKTEDHLKKDKTCQFKIATVPYKSSNNNYNWTIKRDIPTATYFVRAYVLN GNGEEIGYGQNTDDKKVDNLFSIQAISGRHATLDICSVVFSAFSVVSLFAFFYMEKRKARAGK
TaNPF7.1a	gi|1802554931|gb|QHQ92746.1|	MSANEGELKMRVIAMGGDAAAERRAAEEKLCEYTLDGSVDIKGRPAVKGKSGGWLAGGLILVNQGLATMA FFGVNVNLVLFLTRVVQQSNGDAANNVSKWTGTVYMFSLIGAFLSDSYWGRYKTCAIFQAIFVLVSTLVF VALYTRAIDRWAITVAVHIRDVRTNVGGTARPWADDGLCAFLQGLGLLSLSSRLYLIRPVGCGTEHTPCA SHSGTEMGIFYIALYMIAFGNGGYQPNIATFGADQFDEEDPAEAHSKVSFFSYFYLALNLGSLFSNTFLS YLQDHGKWVLGFWASTAAAATALLLFLSGTPQYRHAQPCGNPMASICQVASAACRNWKAGGVSCSSDVEI LYEGDDKTDAGSRKLLHTKGFRFLDRAALTTEDTSSKLATCSKT…
TaNRT1.1	GenBank: AAT69243.1	MDSTDQFDNSPLLDGDGSSQENTTEYTGDGSVCISGHPASRKHTGNWKASFLIIVCSFCCYLAYSSIGKN LVSYLTKVLHETNLDAARHVATWQGTSYLAPLVGAFVADSYLGKYRTALIACKIFIIGMMMLLLSAALQL ISAGPHAWTVWVHLVSSQYTIFLIGLYMVGLGYGAQRPCVTSFGADQFDDTDYVEKTRKSSFFNWHYFAI NAGSLIAGTVIVWVQEHEGWLWGFTISTLFVTLGVCIFFLGSIVYRFQKPRGSPLTRLCQVVIAATRNFD KVLPCDSSALYEFMGQGSAIEGRRKLEHTTGLGFFDKAAIVTLPDCESPGQHNKWKICTVTQVEELKILI RMFPIWSAMILFAAVQEQMSSTFVEQGMAMDKHIGSFEIPSASF…
TaNRT1.2	GenBank: AAT37840.1	MDSTDRFDKSPLLDGGSSSQENSTEYTGDGSVCTSGHPASRKHTGNWKVSSLTIVCSFCCYLAYSSIGKN LVSYLTKVLDETNLDAARHVATWQGTSYLAPLVGAFVADSYLGKYRTALISCTIFIMGMMMLLLSAALPL ISAGPHAWTLWADPISSRYIIFLVGLYMVGLGYGAQCPCVTSFGADQFDDTNEMEKTRKSSFFNWHYFSI NAGSLIAGTVIVWVQEHEGWLWGFTISTLFVTLGISVFFLGSIVYRFQKPGGSPLARIWQVVVAASRNFD KVLPCDSSALYEFSGQGSAIEGSRKSEHTSGLEFFDKAAILTLPDCESPGQLNKWKICTVTQVEELKILI RMFPIWSAMVLFAAVQEQMFSTFVEQGMTMEKHVGSFEIPTASF…
TaNRT2.1	XP_044408714.1	MEVEASAHGDTAASKFTLPVDSEHKAKSFRLFSFANPHMRTFHLSWISFFTCFVSTFAAAPLVPIIRDNL NLAKADIGNAGVASVSGSIFSRLAMGAICDLLGPRYGCAFLVMLSAPTVFCMAAIDDASGYIAVRFLIGF SLATFVSCQYWMSTMFNSKIIGTVNGLAAGWGNMGGGATQLIMPLVFHAIQKCGATPFVAWRIAYFVPGM MHIVMGLLVLTMGQDLPDGNLASLQKKGDMAKDKFSKVLWGAVTNYRTWIFVLLYGYCMGVELTTDNVIA EYYYDHFHLDLRAAGTIAACFGMANIVARPMGGYLSDLGARYFGMRARLWNIWILQTAGGAFCIWLGRAS ALPASVTAMVLFSICAQAACGAVFGVAPFVSRRSLGIISGLTGA…
TaNRT2.3	gi|2123700516|ref|XP_044337119.1|	MEGESKPAAMGVQAAPKGKFRMPVDSDNKATEFWLFSFARPHMSAFHLSWFSFFCCFVSTFAAPPLLPLI RDNLGLTGKDIGNAGIASVSGAVFARLAMGTACDLVGPRLASAAIILLTTPAVYCSAIIDSASSFLLVRF FTGFSLASFVSTQFWMSSMFSSPKVGLANGVAGGWGNLGGGAVQFIMPLVYEIVRKIGSTDFVAWRIAFF IPGIMQTFSAIAVLAFGQDMPDGNYRKLHKSGEMHKDSFGNVLRHAVTNYRAWILALTYGYCFGVELAVD NIVAQYFYDRFDVNLHTAGLIAASFGMANIISRPGGGLMSDWLSDRFGMRGRLWGLWVVQTIGGVLCVVL GVVDYSFGASVAVMILFSFFVQAACGLTFGIVPFVSRRSLGLIS…
TaNRT2.4	gi|2123946062|ref|XP_044428576.1|	MVTMGKKVDQEQSYYNDWAHIDHGVDADGRATELRPLALSRPHTQAFHLAWLSLFACFFAAFAAPPILPA LRPALVLAPSDASAAAVASLSAALVGRLAMGAACDLLGPRRASGVASLVCALALALAAVYASSPAGFVAL RFCAGLSLSNFVANQHWMSRIFAPSGVGLANAVAAGWANVGSAAAQVVMPLAYDLIVLRLGVPITVAWRV AYLIPCAMLITTGLAVLAFPYDLPSGCAYAGGGKGAKGEGFWKVVRGGVCDYRAWVLALTYGYCYGVELI MENVAADFFRRRFRLPMEAAGAAAACFGVMNTVARPAGGVASDVVGRRFGMRGRLWALWAVQSTGAVLCV LVGRMGATEAPSLAATMAVMVACGAFVQAASGLTFGIVPFVSKR
